# Supplementary material for: Dynamics of benzene excimer formation from the parallel-displaced dimer
Source: Royal Society of Chemistry journal article supplement (doi:10.1039/c8cp06354k), 2018-12-13
Supplement: c8cp06354k1.pdf [file c8cp06354k1.pdf]

## Supporting Information

# Dynamics of Benzene Excimer Formation from the Parallel-Displaced Dimer

Thiago Messias Cardozo,<sup>1,\*</sup> Andre Pessoa Galliez,<sup>1</sup> Itamar Borges Jr.,<sup>2</sup> Felix Plasser,<sup>3</sup>  
Adelia J. A. Aquino,<sup>4,5,6</sup> Mario Barbatti,<sup>7,\*</sup> Hans Lischka,<sup>4,5,6,\*</sup>

<sup>1</sup> *Instituto de Química, Universidade Federal do Rio de Janeiro,  
Rio de Janeiro, RJ 21941-909, Brazil.*

<sup>2</sup> *Departamento de Química, Instituto Militar de Engenharia,  
Praça General Tibúrcio, 80, 22290-270 Rio de Janeiro, Brazil*

<sup>3</sup> *Department of Chemistry, Loughborough University, LE11 3TU, United Kingdom*

<sup>4</sup> *School of Pharmaceutical Sciences and Technology, Tianjin University,  
Tianjin 300072, P.R. China*

<sup>5</sup> *Department of Chemistry and Biochemistry, Texas Tech University,  
Lubbock, Texas 79409, United States*

<sup>6</sup> *Institute of Theoretical Chemistry, University of Vienna,  
Währingerstraße 17, 1090 Vienna, Austria*

<sup>7</sup> *Aix Marseille Univ, CNRS, ICR, Marseille, France.*

\* *Corresponding authors. E-mail addresses: TMC: thiago@iq.ufrj.br; MB:  
mario.barbatti@univ-amu.fr; HL: hans.lischka@univie.ac.at*

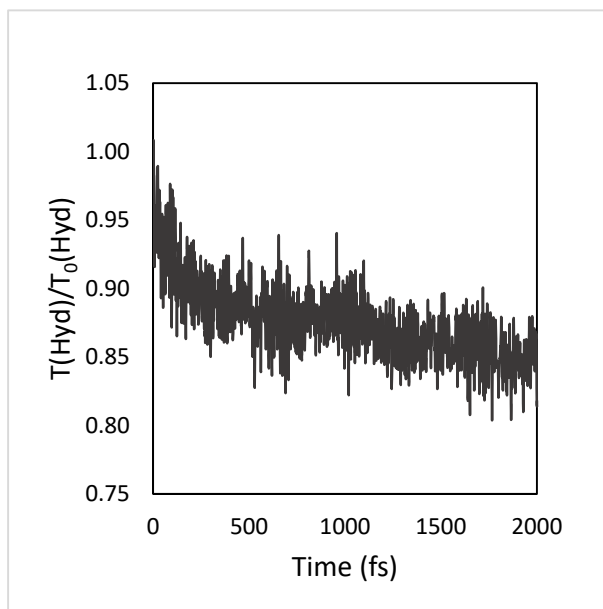

Figure S1. Average total kinetic energy of hydrogen atoms during the dynamics. The values are divided by the  $T(\text{Hyd})$  at 0fs.
